# Supplementary material for: Strikingly high amount of tricin-lignin observed from vanilla (Vanilla planifolia) aerial roots
Source: Royal Society of Chemistry journal article supplement (doi:10.1039/d1gc03625d), 2021-12-09
Supplement: d1gc03625d1.pdf [file d1gc03625d1.pdf]

ESI

## Strikingly High Amount of Tricin-lignin Observed from Vanilla (*Vanilla planifolia*) Aerial Roots

Mi Li <sup>a</sup>, Yunqiao Pu <sup>\*b,c,d</sup>, Xianzhi Meng <sup>e</sup>, Fang Chen <sup>f</sup>, Richard A. Dixon <sup>f</sup>, Arthur J. Ragauskas <sup>\*</sup>

*a,b,c,d,e*

<sup>a</sup> Center for Renewable Carbon, Department of Forestry, Wildlife and Fisheries, The University of Tennessee (UT), Knoxville, TN 37996

<sup>b</sup> BioEnergy Science Center & Center for Bioenergy Innovation

<sup>c</sup> Biosciences Division, Oak Ridge National Laboratory (ORNL), Oak Ridge, TN 37831

<sup>d</sup> UT-ORNL Joint Institute for Biological Sciences, Oak Ridge, TN 37831

<sup>e</sup> Department of Chemical and Biomolecular Engineering, UT, Knoxville, TN 37996

<sup>f</sup> BioDiscovery Institute and Department of Biological Sciences, University of North Texas, Denton, TX, USA 76203

---

\* Corresponding authors: Yunqiao Pu; +1-(865)576-1512; [puy1@ornl.gov](mailto:puy1@ornl.gov); Arthur Ragauskas;

+1-(865)974-2421; [aragausk@utk.edu](mailto:aragausk@utk.edu); PO Box 2008 MS6341, Oak Ridge, TN 37831

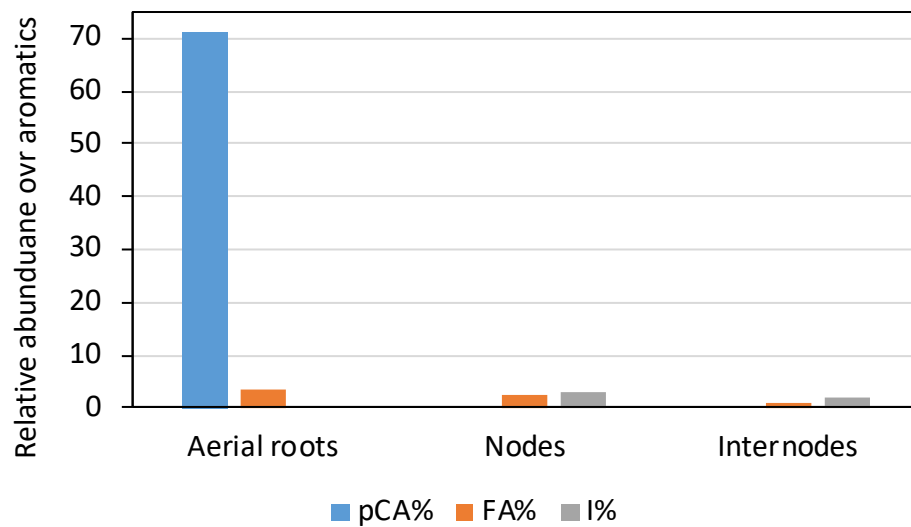

**Fig. S1.**  $^{13}\text{C}$ - $^1\text{H}$  HSQC contour relative abundance of pCA (*p*-coumarate), FA (ferulate), and I (cinnamyl alcohol) over the total aromatics (S+G+H) of lignins isolated from aerial roots, nodes, and internodes of vanilla.

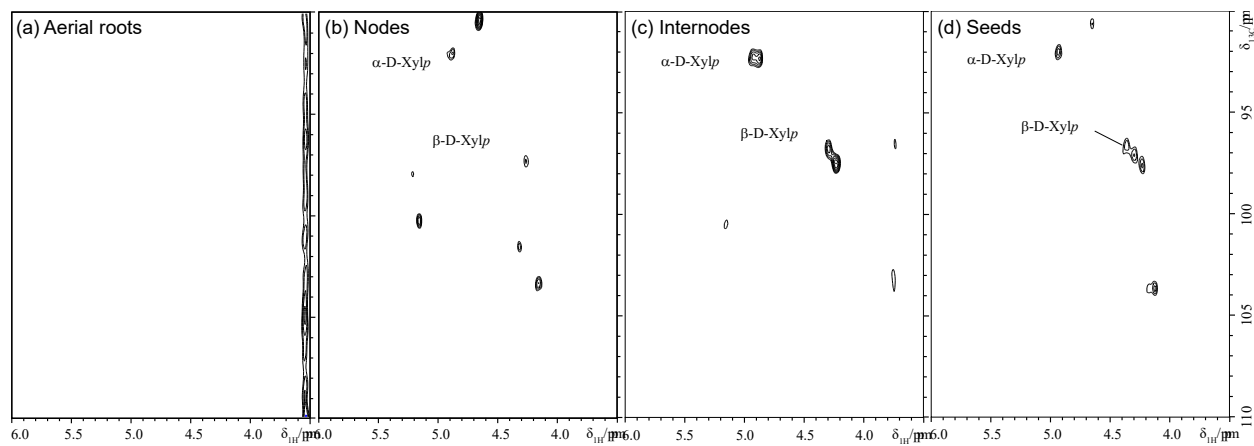

**Fig. S2.**  $^{13}\text{C}$ - $^1\text{H}$  HSQC 2D NMR spectra revealing polysaccharide anomeries of acetylated CEL isolated from aerial roots, nodes, internodes, and seeds of vanilla. Unlabeled contours remain uncertain or unidentified.

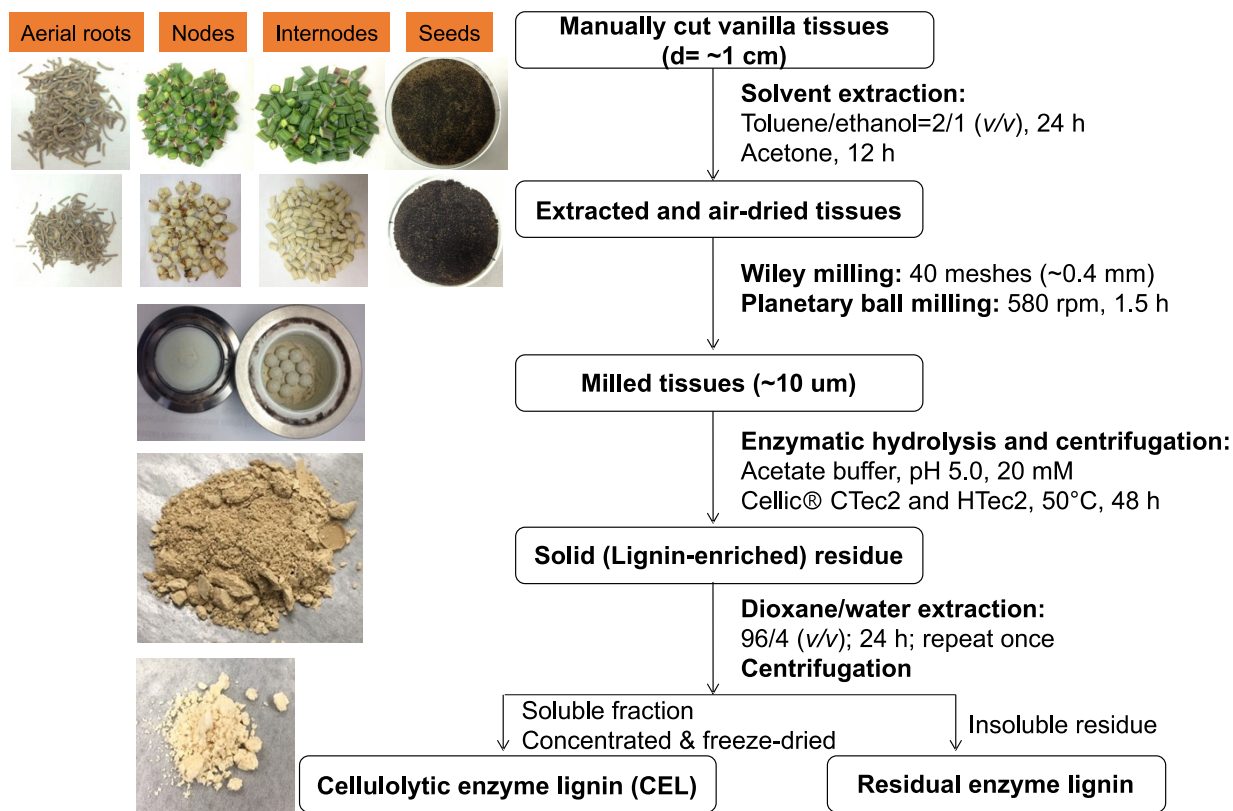

**Fig. S3.** Cellulolytic enzyme lignins (CEL) isolation from vanilla tissues. Inset pictures: vanilla tissues before (first row) and after (second row) solvent extraction.

**Table S1** Assignments of the  $^{13}\text{C}$ - $^1\text{H}$  correlation signals in the HSQC spectra of the lignins.

| Labels                                                  | $\delta_{\text{C}}/\delta_{\text{H}}$ (ppm) | Assignment                                                                                            |
|---------------------------------------------------------|---------------------------------------------|-------------------------------------------------------------------------------------------------------|
| <b>B<math>_{\beta}</math></b>                           | 53.2/3.47                                   | C $_{\beta}$ /H $_{\beta}$ in $\beta$ -5' phenylcoumaran substructures (B)                            |
| <b>C<math>_{\beta}</math></b>                           | 53.6/3.06                                   | C $_{\beta}$ /H $_{\beta}$ in $\beta$ - $\beta'$ resinol substructures (C)                            |
| <b>OMe</b>                                              | 55.5/3.71                                   | C/H in methoxyls                                                                                      |
| <b>A<math>_{\gamma}</math></b>                          | 59.8/3.36 & 3.58                            | C $_{\gamma}$ /H $_{\gamma}$ in normal ( $\gamma$ -hydroxylated) $\beta$ -O-4' substructures (A)      |
| <b>F<math>_{\beta}</math></b>                           | 59.5/2.78                                   | C $_{\beta}$ /H $_{\beta}$ in spirodienone substructures (F)                                          |
| <b>I<math>_{\gamma}</math></b>                          | 61.5/4.10                                   | C $_{\gamma}$ /H $_{\gamma}$ in cinnamyl alcohol end-groups (I)                                       |
| <b>B<math>_{\gamma}</math></b>                          | 62.5/3.75                                   | C $_{\gamma}$ /H $_{\gamma}$ in $\beta$ -5' phenylcoumaran substructures (B)                          |
| <b>A'<math>_{\gamma}</math></b>                         | 62.8/3.70                                   | C $_{\gamma}$ /H $_{\gamma}$ in $\gamma$ -acylated $\beta$ -O-4' substructures (A')                   |
| <b>C<math>_{\gamma}</math></b>                          | 71.0/3.80 & 4.17                            | C $_{\gamma}$ /H $_{\gamma}$ in $\beta$ - $\beta'$ resinol substructures (C)                          |
| <b>A<math>_{\alpha}</math>/A'<math>_{\alpha}</math></b> | 71.5/4.75 & 71.9/4.89                       | C $_{\alpha}$ /H $_{\alpha}$ in $\beta$ -O-4' substructures (A, A') -G&-S, respectively               |
| <b>K<math>_{\alpha}</math></b>                          | 75.1/5.22                                   | C $_{\alpha}$ /H $_{\alpha}$ in benzodioxane (K)                                                      |
| <b>K<math>_{\beta}</math></b>                           | 75.3/4.93                                   | C $_{\beta}$ /H $_{\beta}$ in benzodioxane (K)                                                        |
| <b>F'<math>_{\beta}</math></b>                          | 77.0/4.39                                   | C $_{\beta}$ /H $_{\beta}$ in spirodienone substructures (F)                                          |
| <b>E<math>_{\alpha}</math></b>                          | 78.1/4.12                                   | C $_{\alpha}$ /H $_{\alpha}$ in $\alpha,\beta$ -diaryl ether substructures (E)                        |
| <b>F<math>_{\alpha}</math></b>                          | 81.3/5.07                                   | C $_{\alpha}$ /H $_{\alpha}$ in spirodienone substructures (F)                                        |
| <b>A'<math>_{\beta(S)}</math></b>                       | 83.6/4.33                                   | C $_{\beta}$ /H $_{\beta}$ in $\gamma$ -acylated $\beta$ -O-4' substructures linked to an S unit (A') |
| <b>D<math>_{\alpha}</math></b>                          | 83.1/4.79                                   | C $_{\alpha}$ /H $_{\alpha}$ in 5-5' dibenzodioxocin substructures (D)                                |
| <b>A<math>_{\beta(G)}</math></b>                        | 83.6/4.31                                   | C $_{\beta}$ /H $_{\beta}$ in $\beta$ -O-4' substructures linked to a G unit (A)                      |
| <b>C<math>_{\alpha}</math></b>                          | 84.9/4.66                                   | C $_{\alpha}$ /H $_{\alpha}$ in $\beta$ - $\beta'$ resinol substructures (C)                          |
| <b>A<math>_{\beta(S)}</math></b>                        | 86.1/4.13                                   | C $_{\beta}$ /H $_{\beta}$ in $\beta$ -O-4' substructures linked to an S unit (A)                     |
| <b>B<math>_{\alpha}</math></b>                          | 86.9/5.46                                   | C $_{\alpha}$ /H $_{\alpha}$ in $\beta$ -5' phenylcoumaran substructures (B)                          |
| <b>T<math>_{8}</math></b>                               | 94.1/6.54                                   | C $_{8}$ /H $_{8}$ in triclin units (T)                                                               |
| <b>T<math>_{6}</math></b>                               | 98.8/6.21                                   | C $_{6}$ /H $_{6}$ in triclin units (T)                                                               |
| <b>S<math>_{2/6}</math></b>                             | 103.9/6.72                                  | C $_{2}$ /H $_{2}$ and C $_{6}$ /H $_{6}$ in etherified syringyl units (S)                            |
| <b>T<math>_{2'}/6'</math></b>                           | 104.1/7.30                                  | C $_{2'}$ /H $_{2'}$ and C $_{6'}$ /H $_{6'}$ in triclin units (T)                                    |
| <b>T<math>_{3}</math></b>                               | 104.8/7.04                                  | C $_{3}$ /H $_{3}$ in triclin units (T)                                                               |
| <b>J<math>_{2/6(S)}</math></b>                          | 106.5/7.05                                  | C $_{2}$ /H $_{2}$ and C $_{6}$ /H $_{6}$ in cinnamaldehyde end-groups in S units (J)                 |
| <b>G<math>_{2}</math></b>                               | 110.9/6.99                                  | C $_{2}$ /H $_{2}$ in guaiacyl units (G)                                                              |
| <b>FA<math>_{2}</math></b>                              | 111.2/7.31                                  | C $_{2}$ /H $_{2}$ in ferulic acid units (FA)                                                         |
| <b>pCA<math>_{\beta}</math>+FA<math>_{\beta}</math></b> | 113.5/6.27                                  | C $_{\beta}$ /H $_{\beta}$ in p-coumarate (pCA) and ferulate (FA)                                     |
| <b>G<math>_{5}</math></b>                               | 115.1/6.71 & 6.97                           | C $_{5}$ /H $_{5}$ in guaiacyl units (G)                                                              |
| <b>G<math>_{6}</math></b>                               | 118.9/6.78                                  | C $_{6}$ /H $_{6}$ in guaiacyl units (G)                                                              |
| <b>FA<math>_{6}</math></b>                              | 122.5/7.09                                  | C $_{6}$ /H $_{6}$ in ferulic acid units (FA)                                                         |
| <b>J<math>_{\beta}</math></b>                           | 126.2/6.77                                  | C $_{\beta}$ /H $_{\beta}$ in cinnamaldehyde end-groups (J)                                           |
| <b>I<math>_{\beta}</math></b>                           | 128.2/6.24                                  | C $_{\beta}$ /H $_{\beta}$ in cinnamyl alcohol end-groups (I)                                         |
| <b>I<math>_{\alpha}</math></b>                          | 128.4/6.44                                  | C $_{\beta}$ /H $_{\beta}$ in cinnamyl alcohol end-groups (I)                                         |
| <b>J<math>_{\alpha}</math></b>                          | 153.1/7.59                                  | C $_{\alpha}$ /H $_{\alpha}$ in cinnamaldehyde end-groups (J)                                         |
